# Supplementary material
Source: PubMed Central journal article supplement (PMC6570567)
Supplement: NIHMS1527036-supplement-8.pdf [file NIHMS1527036-supplement-8.pdf]

**Table S1. Descriptive statistics of 6mA distribution in the genome, Related to Figure 1.**

Properties of 6mA distribution in nucleosome linkers. In *Oxytricha*, methyl cluster 1 = between 5' chromosome end and +1 nucleosome; methyl cluster 2 = between +1 and +2 nucleosome; methyl cluster 3 = between +2 and +3 nucleosome. In *Tetrahymena*, methyl cluster 1 = between +1 and +2 nucleosome; methyl cluster 2 = between +2 and +3 nucleosome; methyl cluster 3 = between +3 and +4 nucleosome. Consensus +1/+2/+3/+4 nucleosome positions: 193, 402, 618, 837 bp downstream of *Oxytricha* 5' chromosome ends; 112, 304, 497, 698 bp downstream of *Tetrahymena* TSSs.

|                  | Number of 6mA sites |         |        |      |                    |                    |         |        |      |                    |
|------------------|---------------------|---------|--------|------|--------------------|--------------------|---------|--------|------|--------------------|
|                  | <i>Oxytricha</i>    |         |        |      |                    | <i>Tetrahymena</i> |         |        |      |                    |
|                  | Minimum             | Maximum | Median | Mean | Standard Deviation | Minimum            | Maximum | Median | Mean | Standard Deviation |
| Methyl Cluster 1 | 0                   | 14      | 2      | 2.03 | 2.27               | 0                  | 27      | 10     | 9.68 | 6.10               |
| Methyl Cluster 2 | 0                   | 24      | 6      | 5.99 | 4.24               | 0                  | 26      | 9      | 8.78 | 5.78               |
| Methyl Cluster 3 | 0                   | 16      | 2      | 2.49 | 2.91               | 0                  | 25      | 5      | 5.75 | 5.53               |

**Table S2. Candidate genes in ciliates, Related to Figures 2 and 6.**

The Uniprot ID of each gene is listed. The *Oxytricha* macronuclear genome encodes five genes belonging to the MT-A70 family (Iyer et al., 2016; Swart et al., 2013). Such genes commonly function as RNA m<sup>6</sup>A MTases in eukaryotes, having evolved from m.MunI-like MTases in bacterial restriction-modification systems (Iyer et al., 2016). An MT-A70 gene belonging to the METTL4 subclade, DAMT-1, is a putative 6mA methyltransferase in *C. elegans* (Greer et al., 2015). However, none of the *Oxytricha* MT-A70 genes in this Table cluster together with METTL4 on a phylogenetic tree (Figures 2A and S2G). The *Oxytricha* genome also contains homologs of a structurally distinct RNA m<sup>6</sup>A MTase, METTL16, which was reported to methylate U6 snRNA (Table S2) (Pendleton et al., 2017; Warda et al., 2017). Another candidate, N6AMT1 – which does not contain an MT-A70 domain – was recently found to mediate DNA 6mA methylation in human cells (Xiao et al., 2018). An N6AMT1 homolog is also present in the *Oxytricha* genome. Accessory factors refer to the p1 and p2 proteins, which are necessary for 6mA methylation by MTA1 and MTA9 *in vitro*. The UniProt IDs of putative ISWI homologs in *Oxytricha* and *Tetrahymena* are also listed.

**MT-A70 genes in *Oxytricha trifallax***

| UniProt ID   | Gene name in this study | OxyDB gene name     |
|--------------|-------------------------|---------------------|
| J9IF92_9SPIT | MTA1                    | Contig12701.0.0.g16 |
| J9IGS7_9SPIT | TAMT-1                  | Contig17486.0.g100  |
| J9J9V7_9SPIT | MTA1-B                  | Contig16314.0.g25   |
| J9HW68_9SPIT | MTA9                    | Contig1237.1.g126   |
| J9IMU5_9SPIT | MTA9-B                  | Contig17419.0.g36   |

**MT-A70 genes in *Tetrahymena thermophila***

| UniProt ID   | Gene name in this study | <i>Tetrahymena</i> Genome Database gene name |
|--------------|-------------------------|----------------------------------------------|
| Q22GC0_TETTS | MTA1                    | TTHERM_00704040                              |
| Q23TW8_TETTS | MTA2                    | TTHERM_00962190                              |
| I7LVP8_TETTS | MTA3 / TAMT-1-B         | TTHERM_00136470                              |
| I7MGX6_TETTS | MTA4                    | TTHERM_00558100                              |
| Q23RE0_TETTS | MTA5 / TAMT-1           | TTHERM_00388490                              |
| I7MIF9_TETTS | MTA9                    | TTHERM_00301770                              |
| Q22XT1_TETTS | MTA9-B                  | TTHERM_01005150                              |

**METTL16 homologs in *Oxytricha trifallax***

| UniProt ID   | OxyDB gene name   |
|--------------|-------------------|
| J9F3J7_9SPIT | Contig11945.0.g48 |
| J9J5P9_9SPIT | Contig7462.0.g41  |
| J9III0_9SPIT | Contig4244.0.g39  |

**N6AMT1 homologs in *Oxytricha trifallax***

| UniProt ID   | OxyDB gene name  |
|--------------|------------------|
| J9IFV1_9SPIT | Contig7751.0.g12 |

**Accessory factor genes in *Tetrahymena thermophila***

| UniProt ID   | Gene name in this study | <i>Tetrahymena</i> Genome Database gene name |
|--------------|-------------------------|----------------------------------------------|
| Q22VV9_TETTS | p1                      | TTHERM_00161750                              |
| I7M8B9_TETTS | p2                      | TTHERM_00439330                              |

**ISWI homologs in *Oxytricha trifallax* and *Tetrahymena thermophila***

| UniProt ID   | OxyDB gene name   | <i>Tetrahymena</i> Genome Database gene name |
|--------------|-------------------|----------------------------------------------|
| I7M280_TETTS |                   | TTHERM_00137610                              |
| J9FBJ2_9SPIT | Contig11737.0.g12 |                                              |

*Oxytricha* genome database (OxyDB): <http://oxy.ciliate.org/index.php/home/welcome>

*Tetrahymena* genome database: <http://ciliate.org/index.php/home/welcome>

**Table S3. Mass spectrometry analysis of MTA1, MTA9, p1, and p2 proteins, related to Figure 2.**

Percentage of each polypeptide that is covered by peptide data is calculated. "Low Salt Sample" and "High Salt Sample" correspond to partially purified nuclear extracts that elute as two distinct peaks of activity from a Q sepharose anion exchange column (Figure 2C).

**Data from Low Salt Fraction**

| <b>UniProt ID</b> | <b>Gene name in this study</b> | <b>% of protein covered by peptide data from LC-MS/MS experiment</b> |
|-------------------|--------------------------------|----------------------------------------------------------------------|
| Q22GC0_TETTS      | MTA1                           | 78.8%                                                                |
| I7MIF9_TETTS      | MTA9                           | 46.3%                                                                |
| Q22VV9_TETTS      | p1                             | 41.9%                                                                |
| I7M8B9_TETTS      | p2                             | 81.7%                                                                |

**Data from High Salt Fraction**

| <b>UniProt ID</b> | <b>Gene name in this study</b> | <b>% of protein covered by peptide data from LC-MS/MS experiment</b> |
|-------------------|--------------------------------|----------------------------------------------------------------------|
| Q22GC0_TETTS      | MTA1                           | 69.9%                                                                |
| I7MIF9_TETTS      | MTA9                           | 72.2%                                                                |
| Q22VV9_TETTS      | p1                             | 55.3%                                                                |
| I7M8B9_TETTS      | p2                             | 93.4%                                                                |

**Table S4. Descriptive statistics of reference genomes, Related to Figure 4.**

Properties of *Oxytricha* chromosomes in native genomic DNA and mini-genome DNA. “+/-” indicates one standard deviation above or below the mean.

|                                            | <b>Native genomic DNA</b>                            | <b>Mini-genome DNA</b>                              |
|--------------------------------------------|------------------------------------------------------|-----------------------------------------------------|
| <b>Chromosome length (bp)</b>              | <b>2449 +/- 742</b><br>Min = 1155<br>Max = 6494      | <b>2107 +/- 778</b><br>Min = 1201<br>Max = 4659     |
| <b>SMRT-seq coverage (x)</b>               | <b>177.4 +/- 117.0</b><br>Min = 75.1<br>Max = 1392.6 | <b>205.3 +/- 136.1</b><br>Min = 77.8<br>Max = 918.4 |
| <b>Total number of 6mA marks in genome</b> | 46,322                                               | 2,344                                               |
| <b>6mA sites per chromosome</b>            | <b>12 +/- 8</b><br>Min = 0<br>Max = 73               | <b>24 +/- 16</b><br>Min = 0<br>Max = 73             |
| <b>AT content (%)</b>                      | <b>67.8 +/- 3.0</b><br>Min = 55.7<br>Max = 76.2      | <b>66.5 +/- 2.7</b><br>Min = 60.2<br>Max = 72.2     |
| <b>RNAseq (FPKM)</b>                       | <b>34.4 +/- 75.2</b><br>Min = 0.0<br>Max = 1444.5    | <b>53.7 +/- 71.5</b><br>Min = 0.1<br>Max = 424.8    |
