# Supplementary material
Source: PubMed Central journal article supplement (PMC6570567)

A

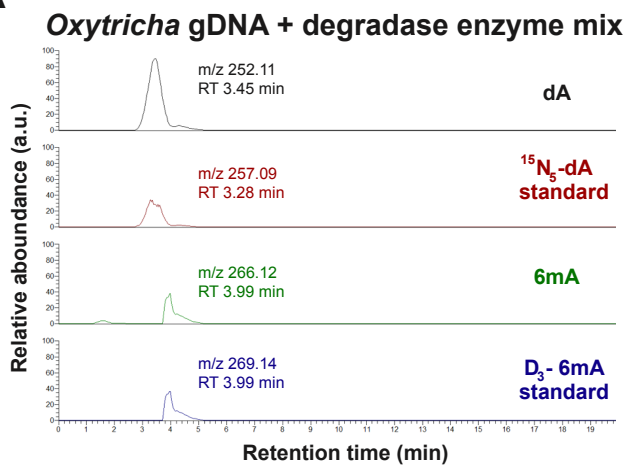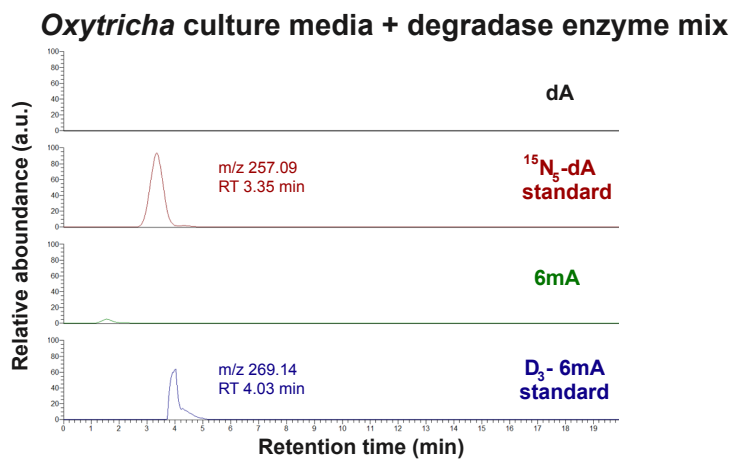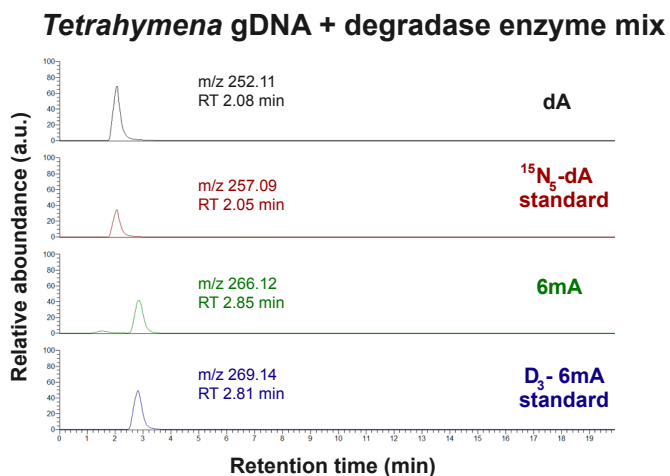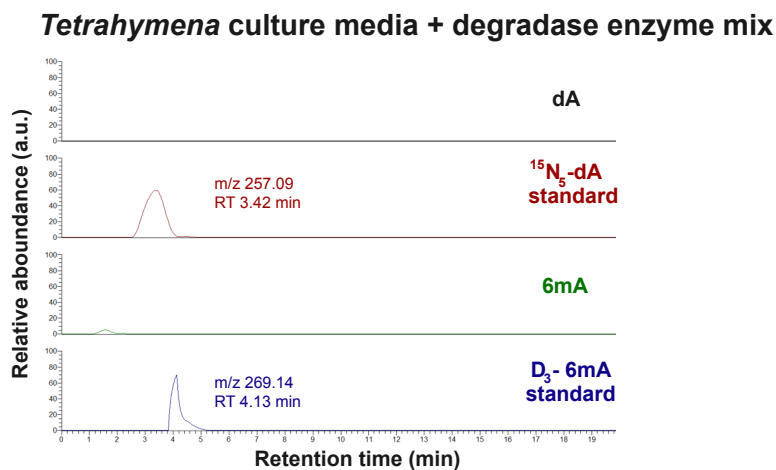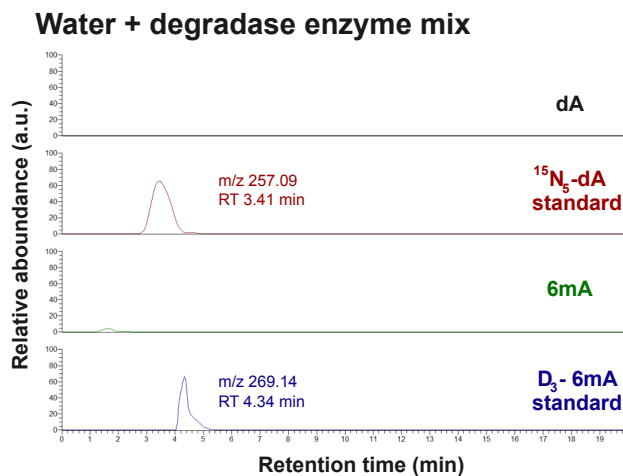

B

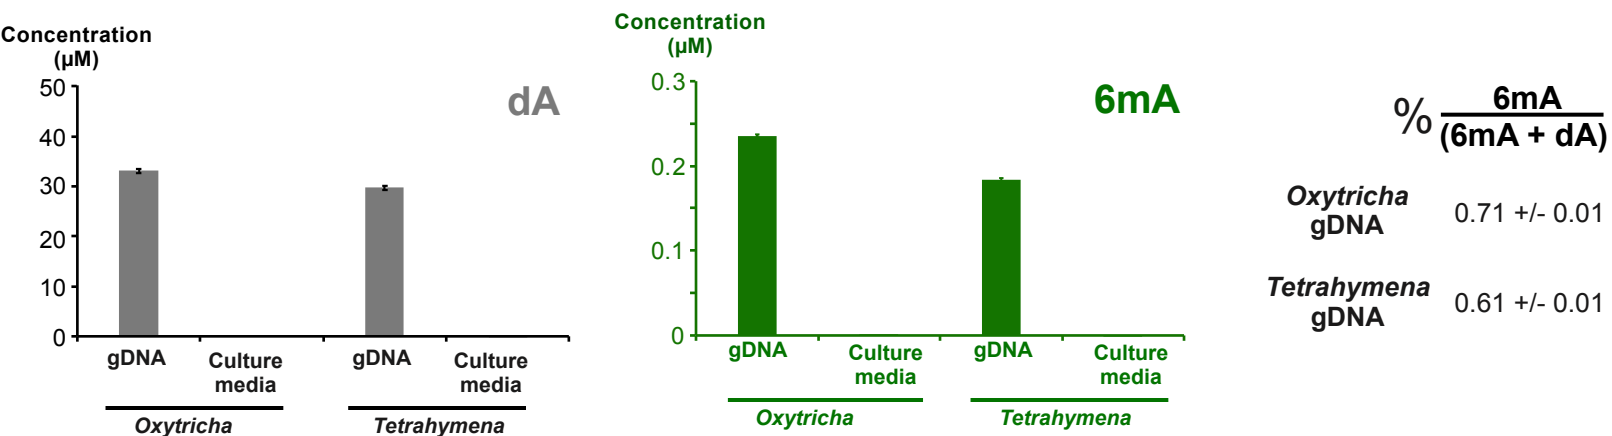

Supplement: NIHMS1527036-supplement-1.pdf [file NIHMS1527036-supplement-1.pdf]

# Beh\_FigS2

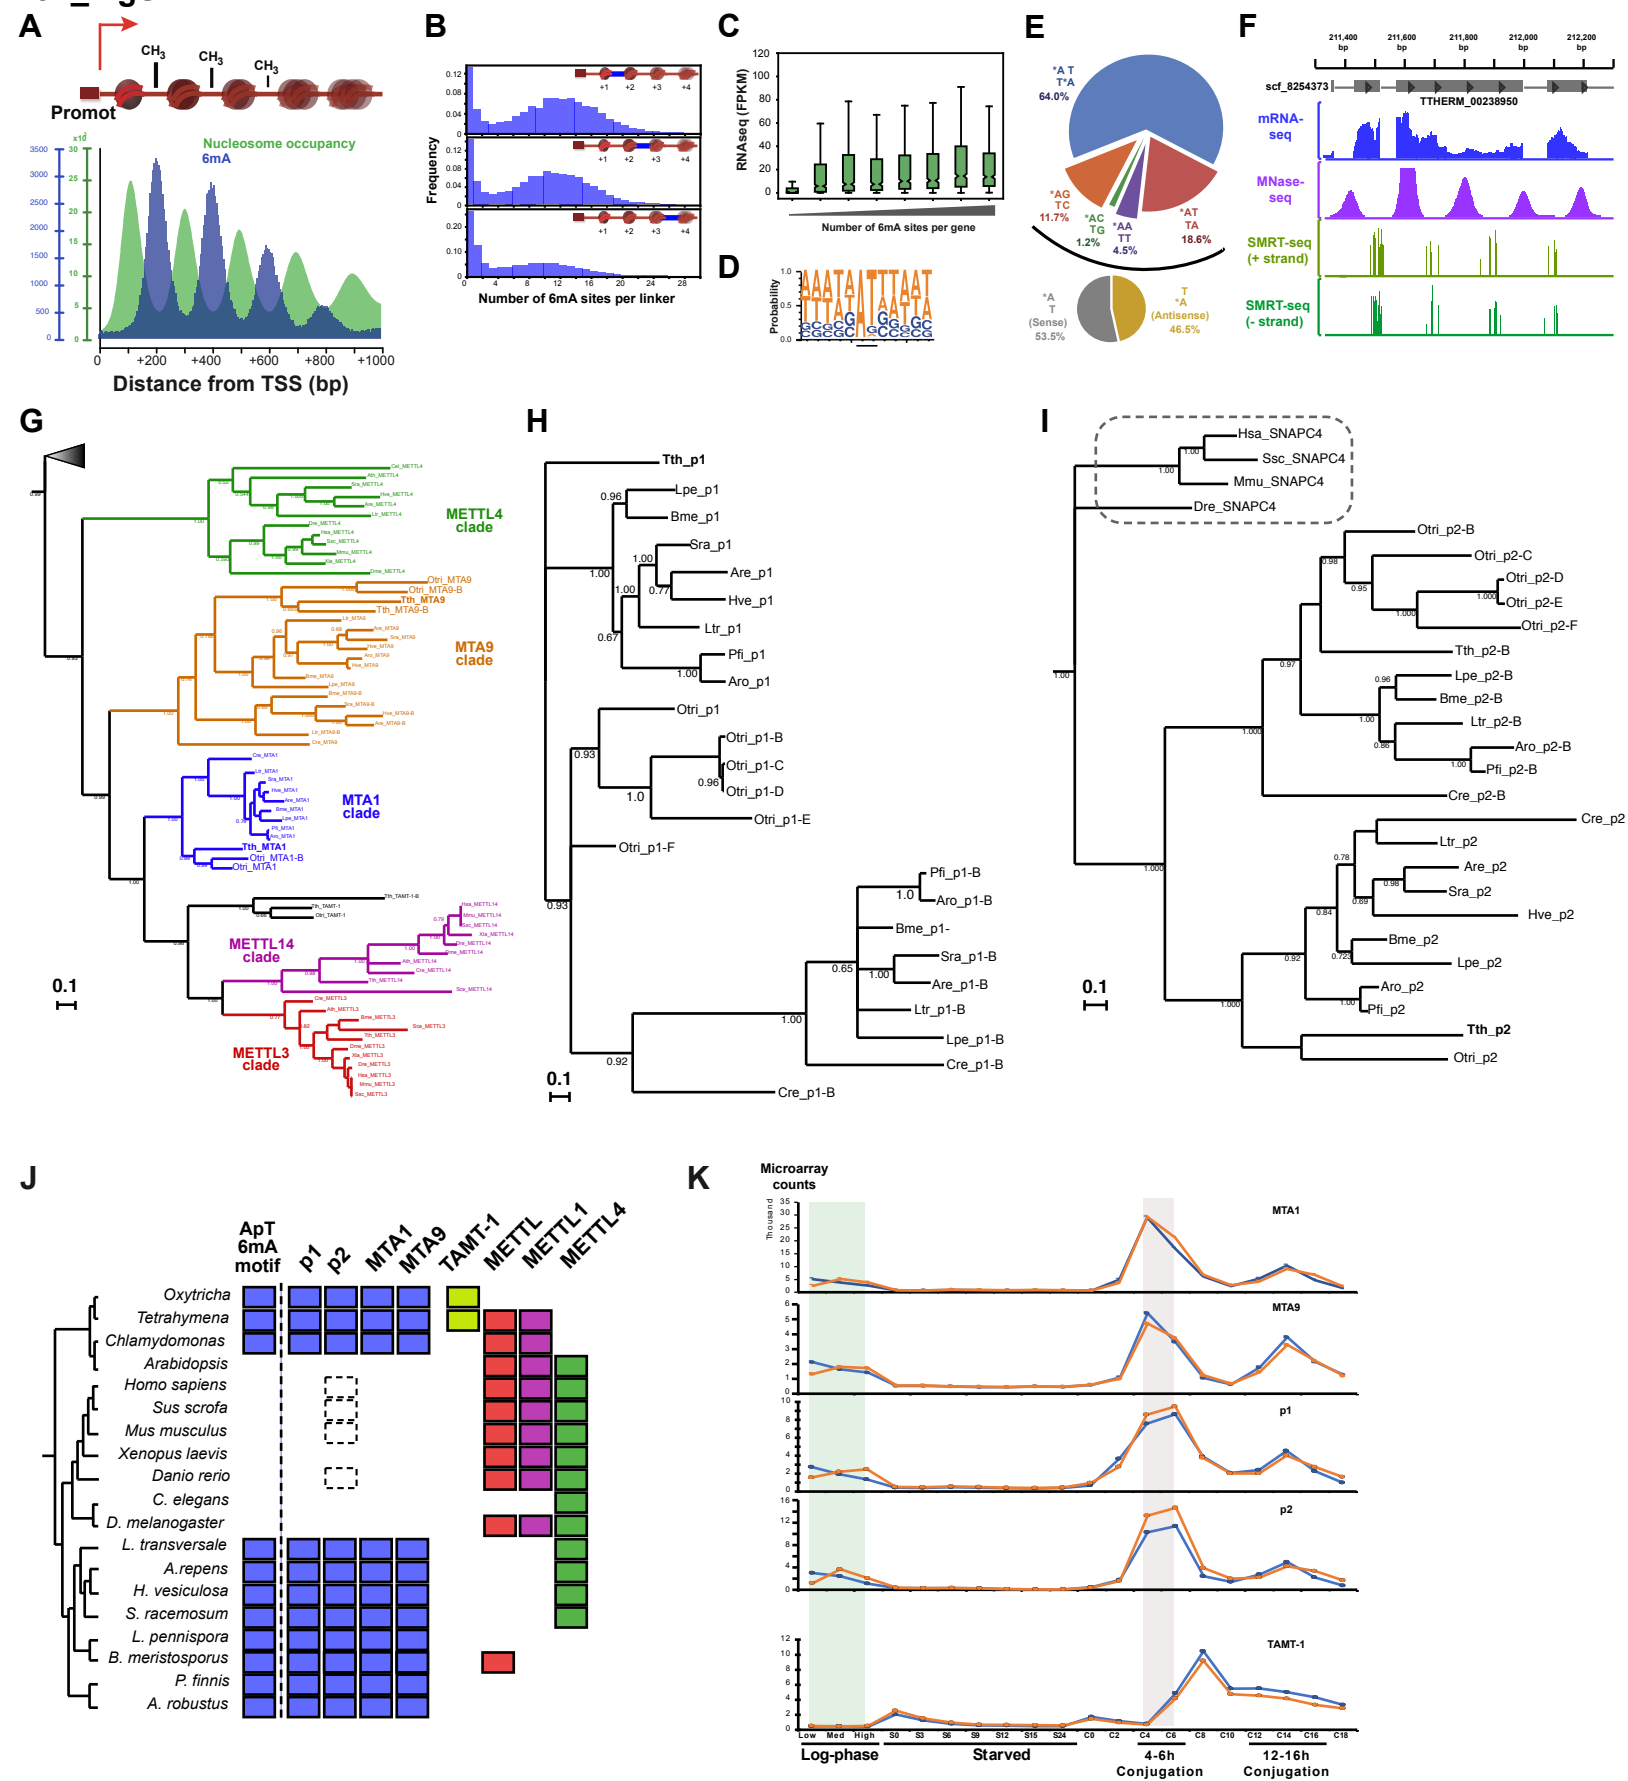

Supplement: NIHMS1527036-supplement-2.pdf [file NIHMS1527036-supplement-2.pdf]

## Beh\_FigS3

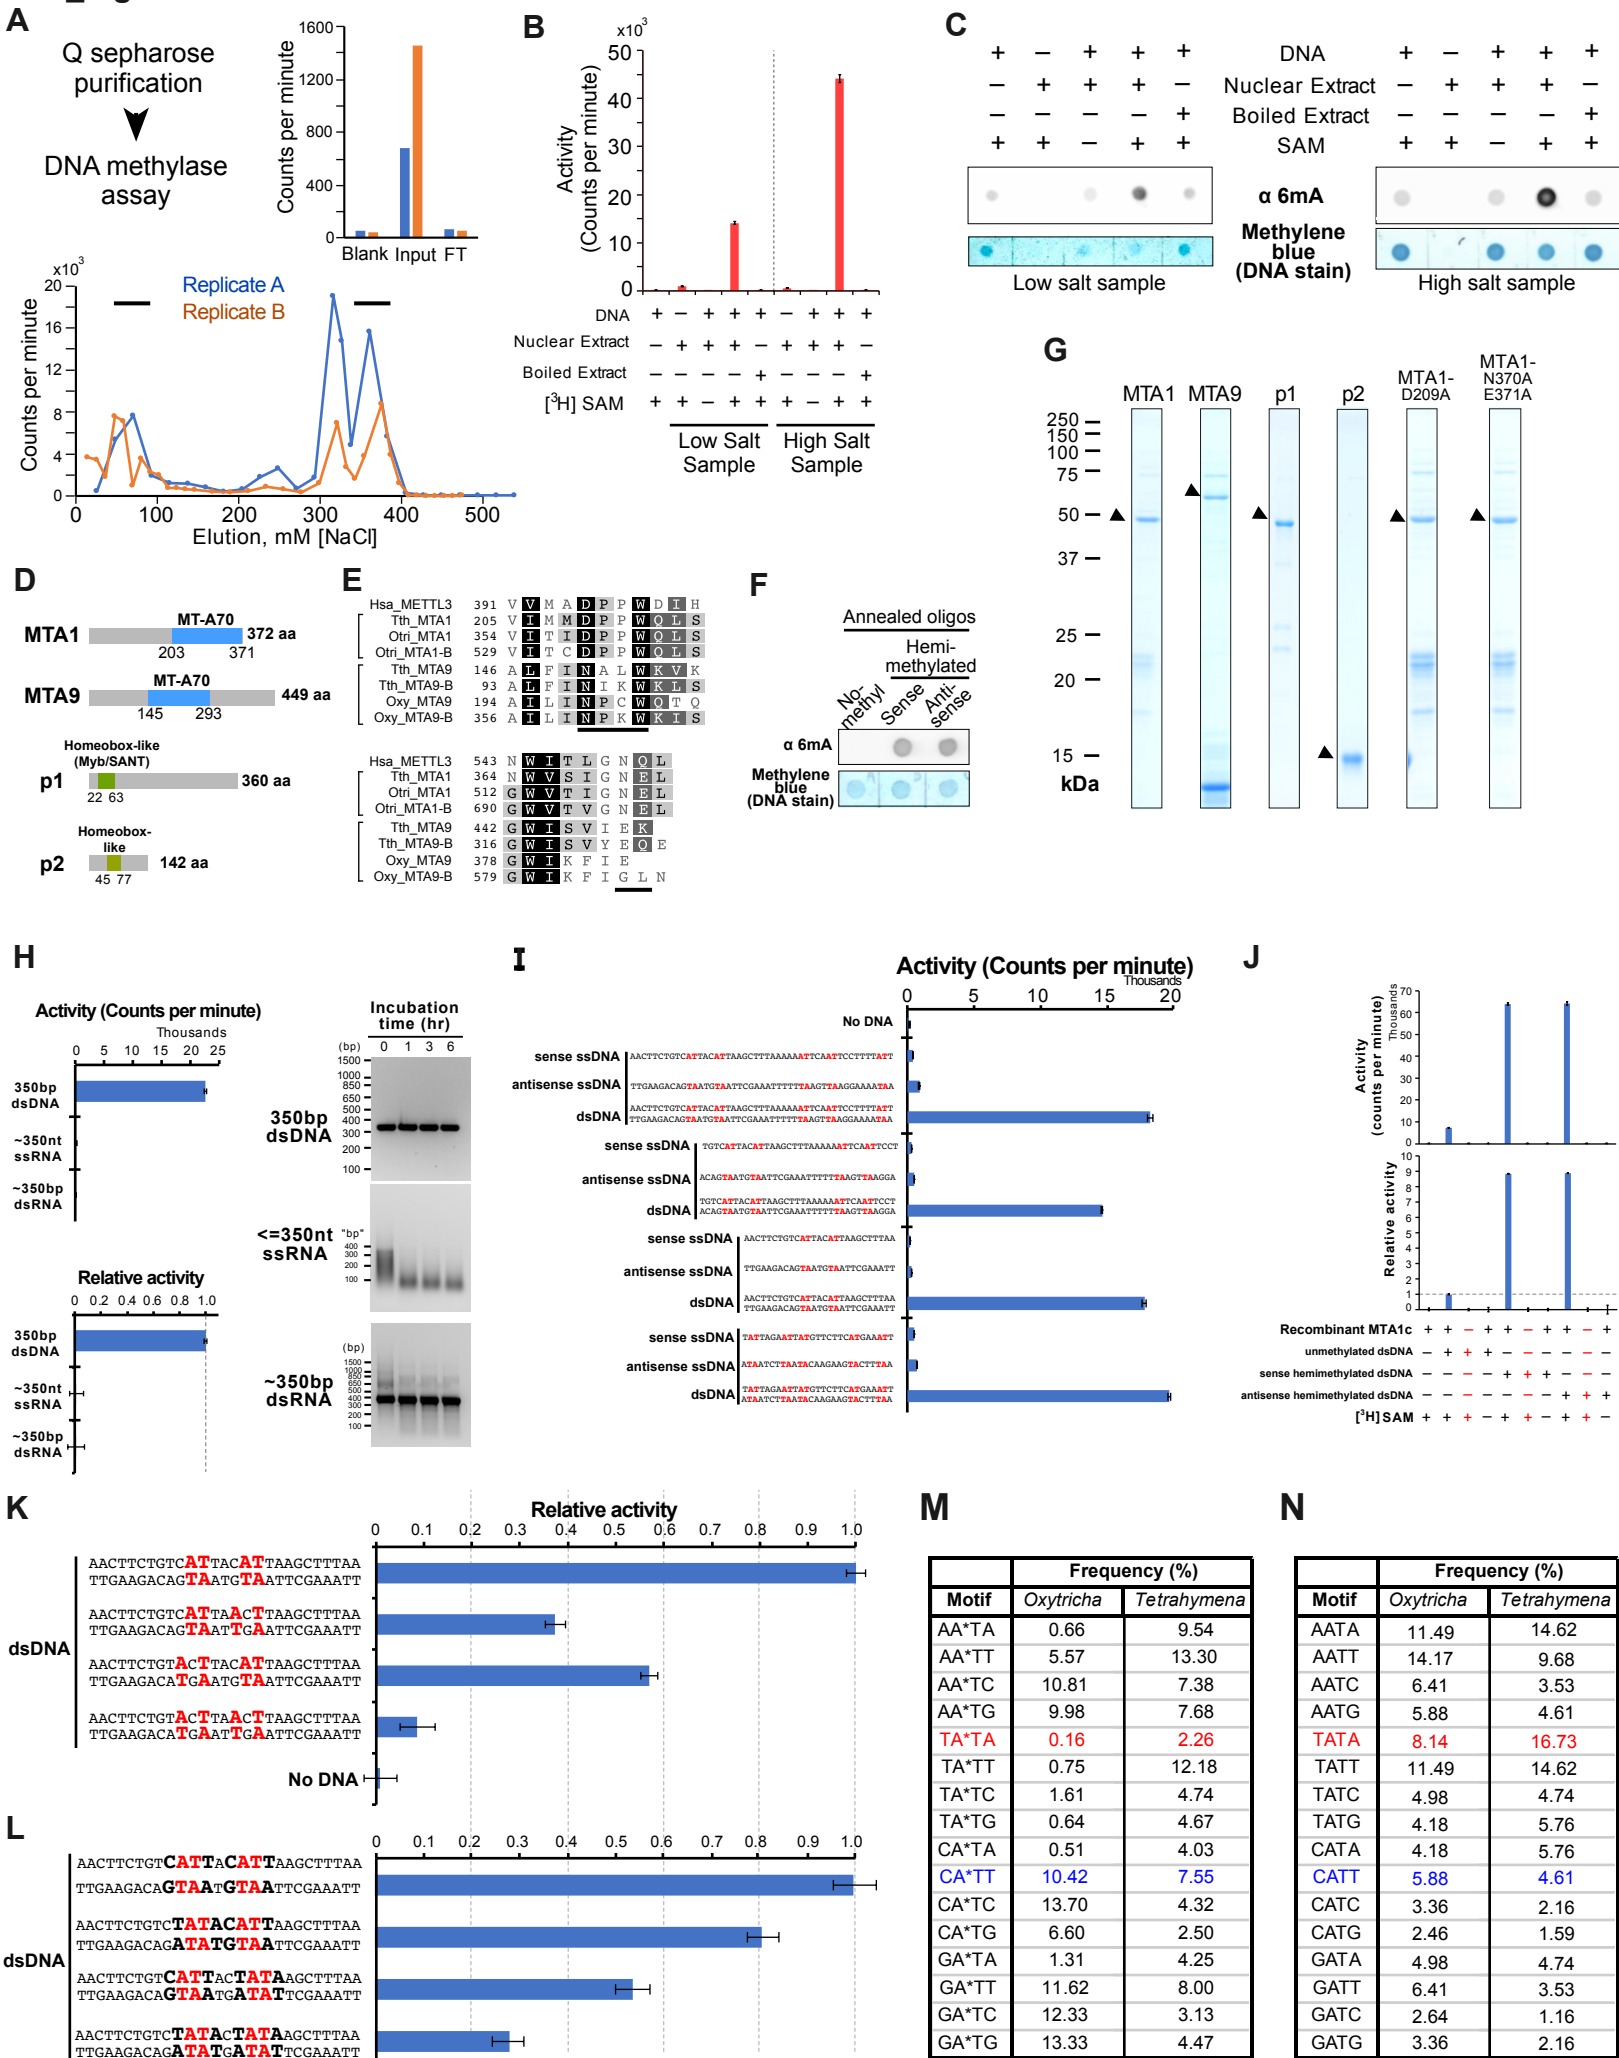

Supplement: NIHMS1527036-supplement-3.pdf [file NIHMS1527036-supplement-3.pdf]

A

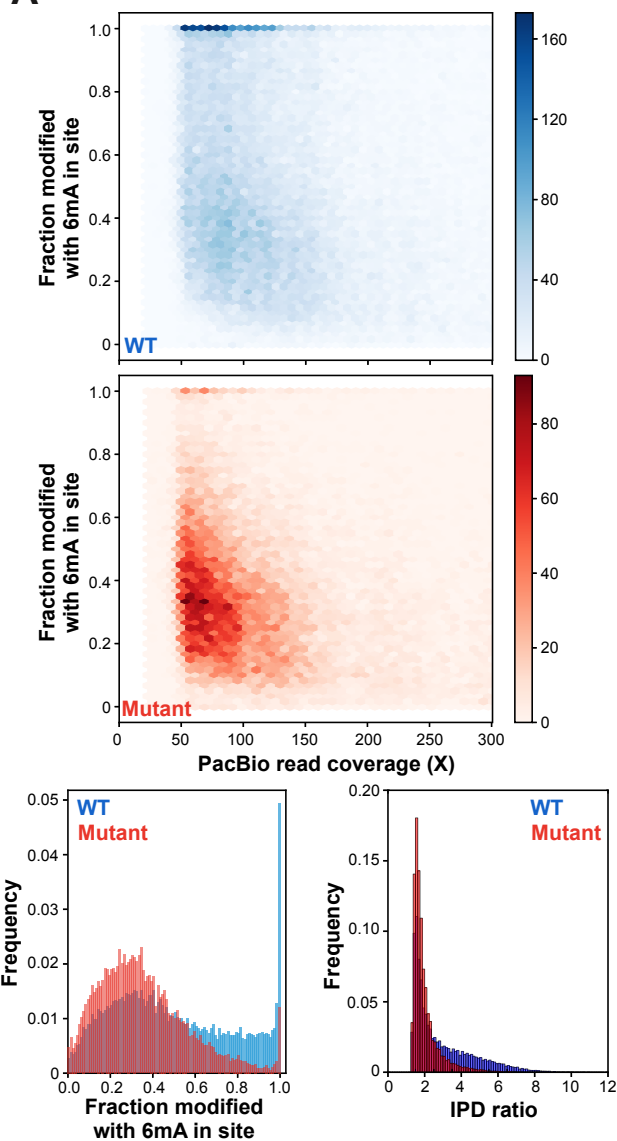

B

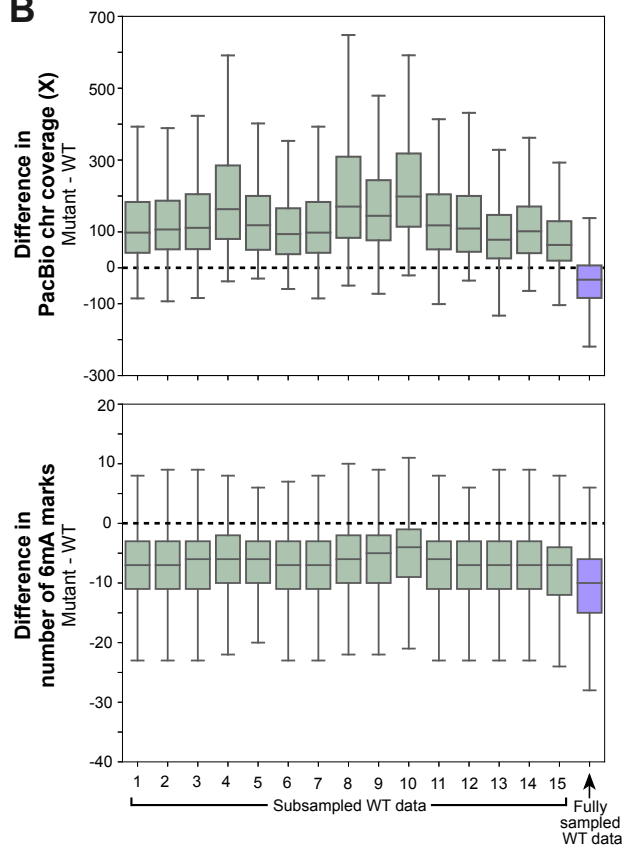

C

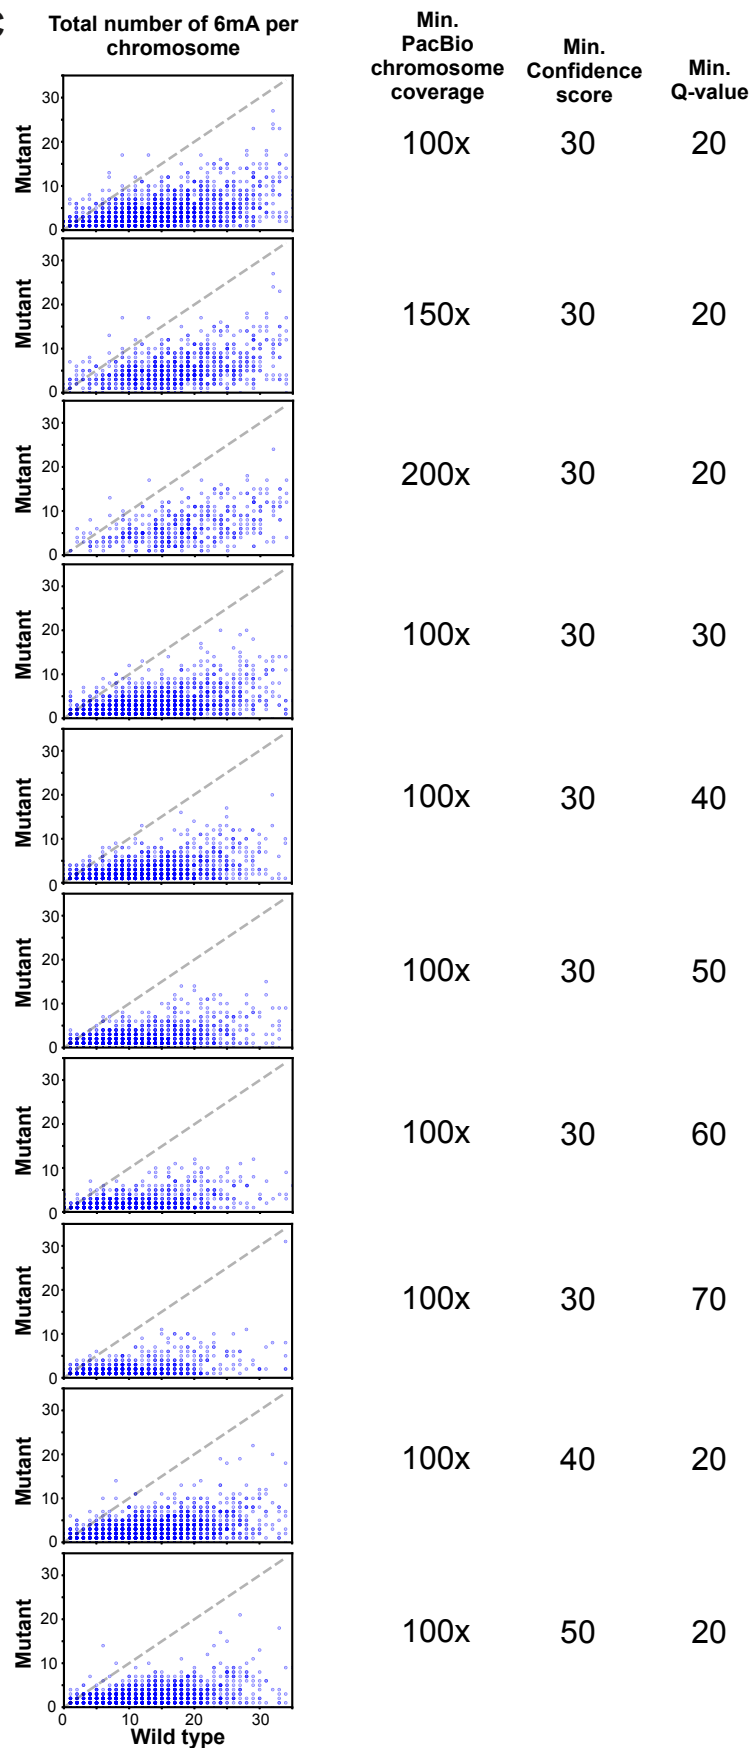

D

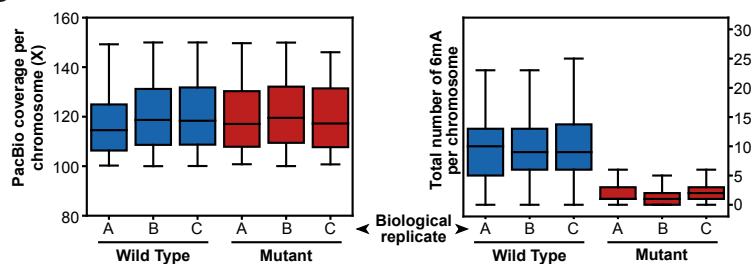

Supplement: NIHMS1527036-supplement-4.pdf [file NIHMS1527036-supplement-4.pdf]

## Possible effects of 6mA loss *in vivo*

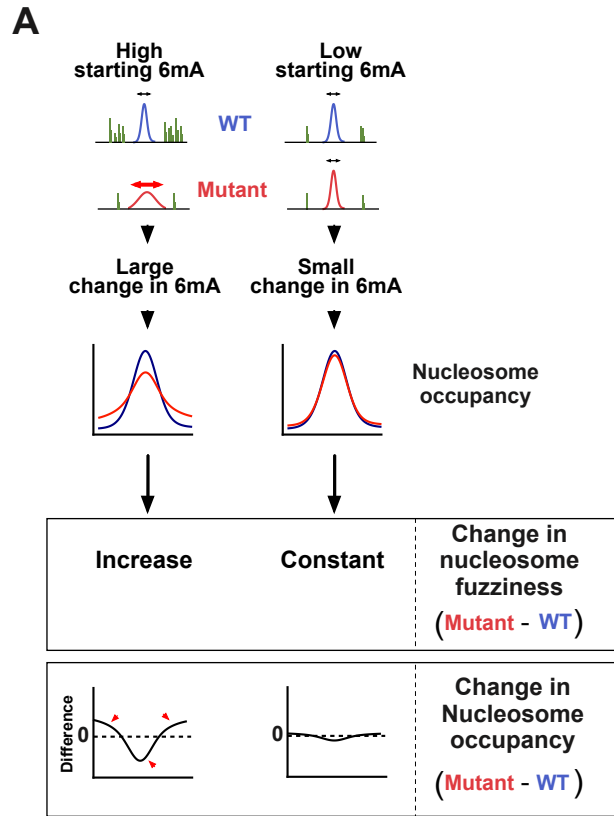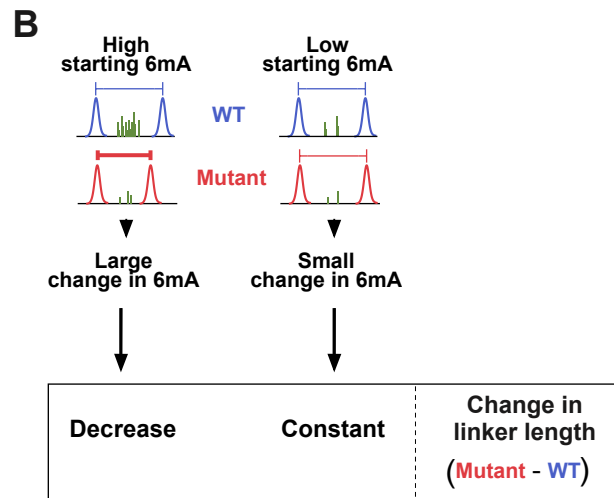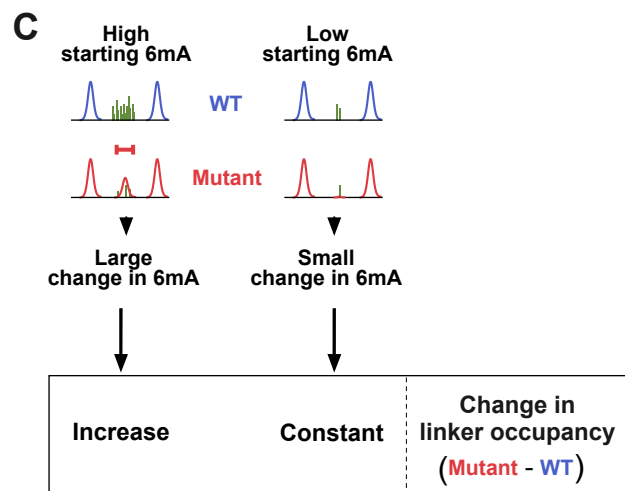

## Observed effects of 6mA loss *in vivo*

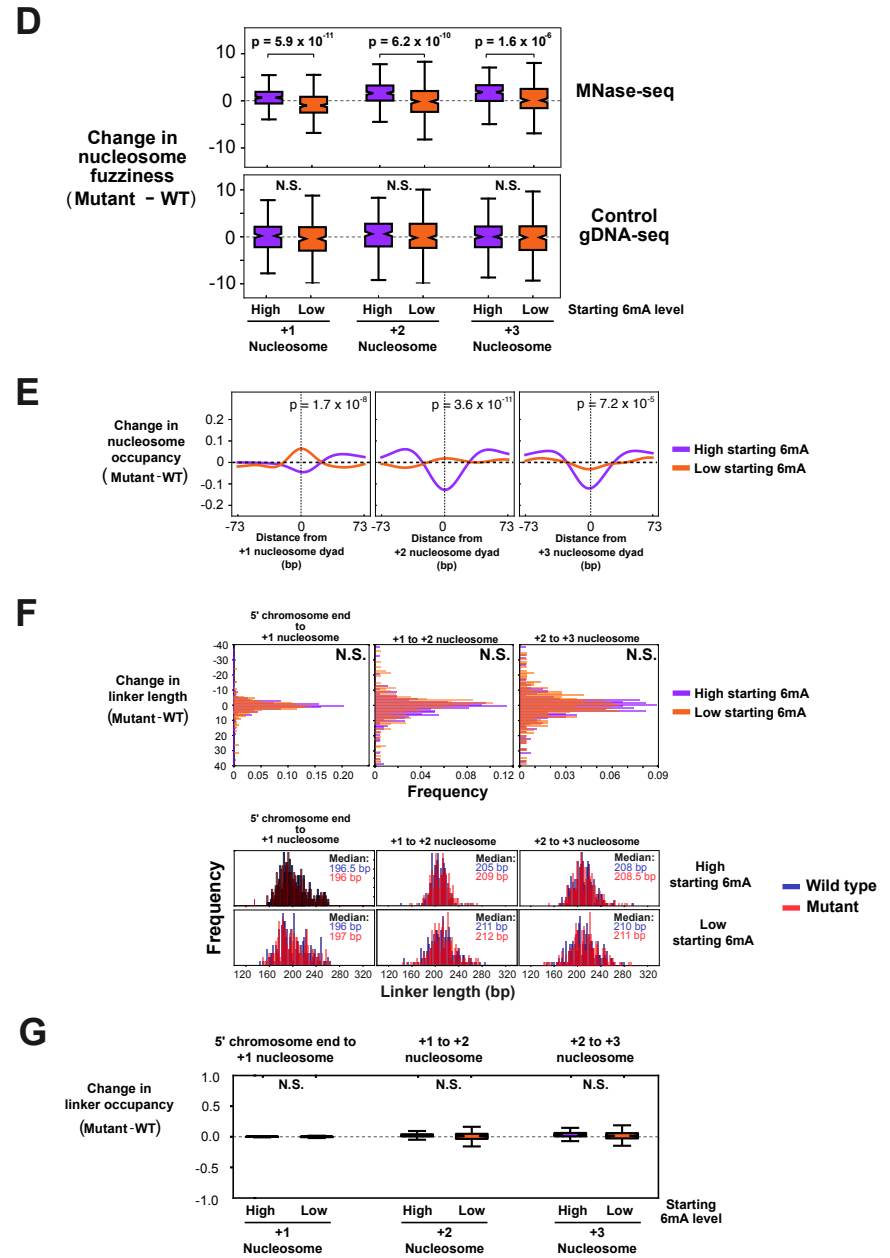

Supplement: NIHMS1527036-supplement-5.pdf [file NIHMS1527036-supplement-5.pdf]

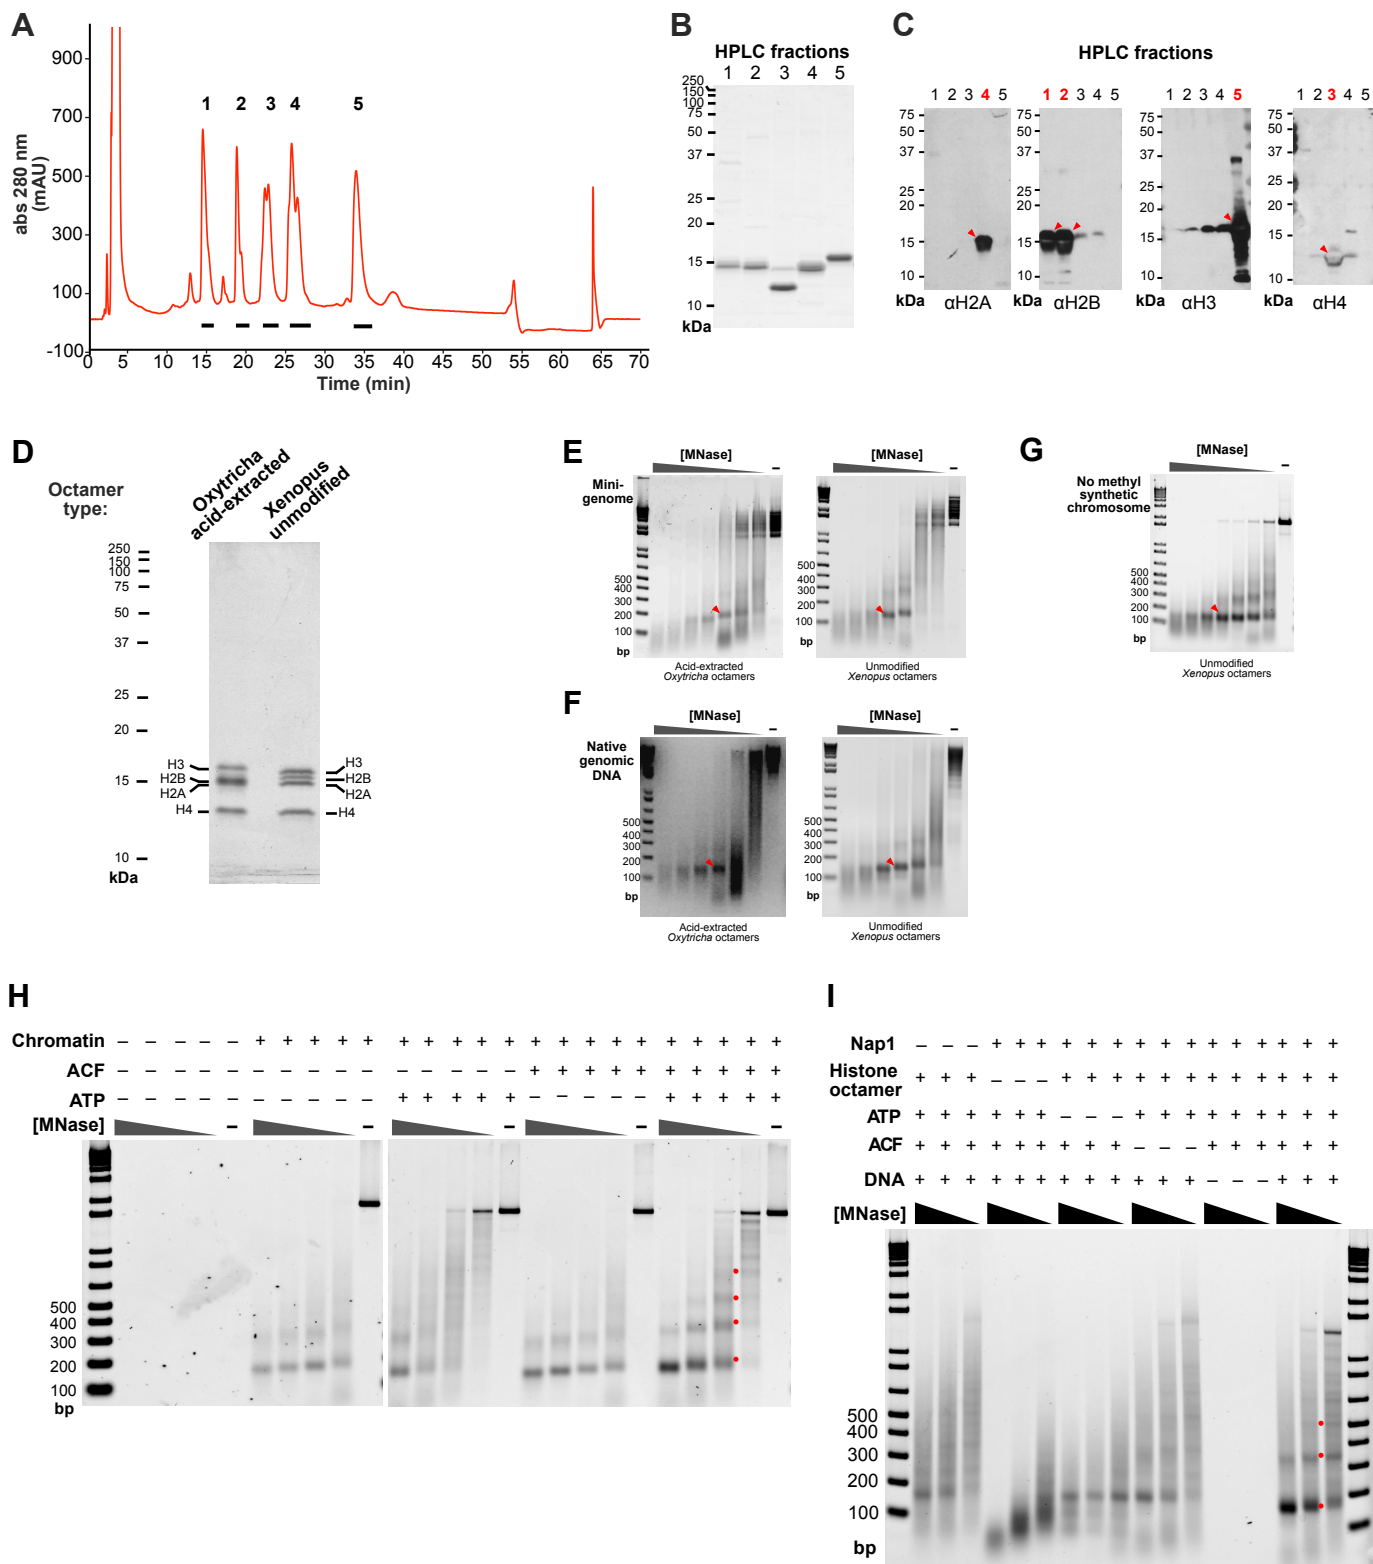

Supplement: NIHMS1527036-supplement-6.pdf [file NIHMS1527036-supplement-6.pdf]

A

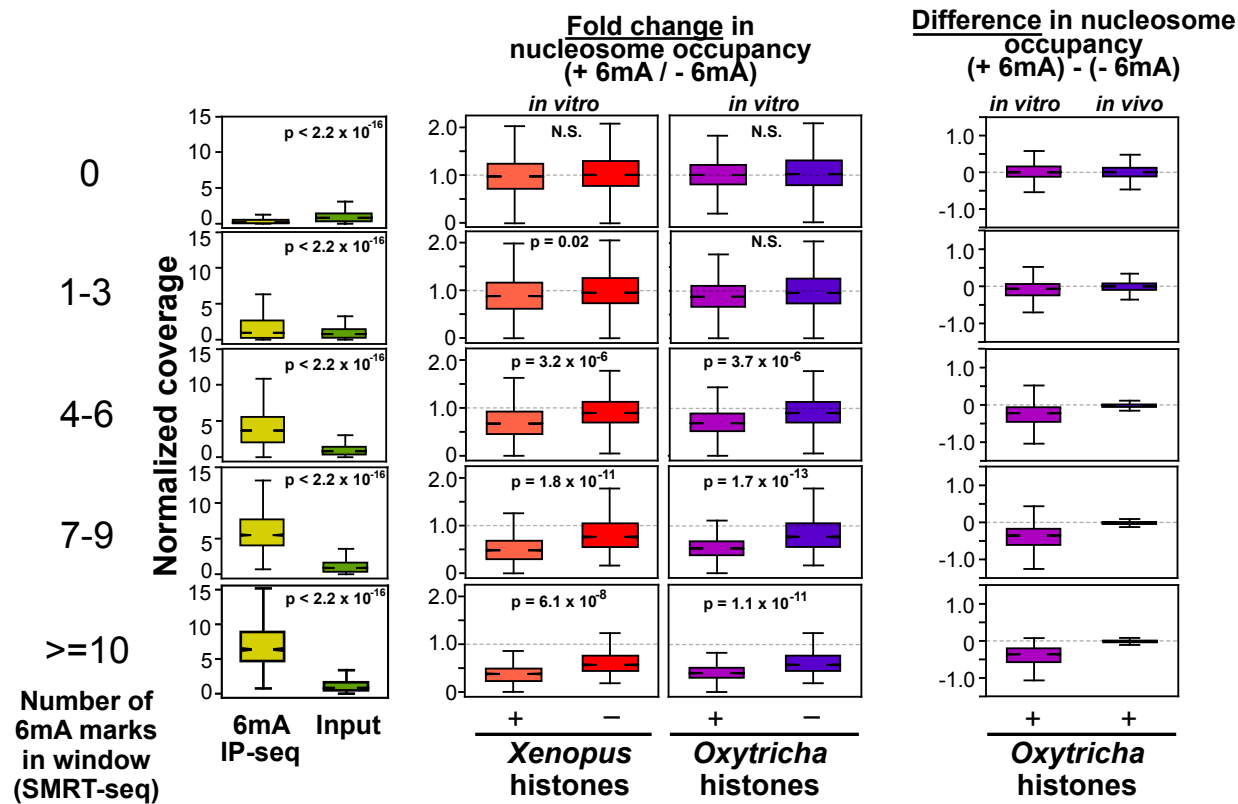

B

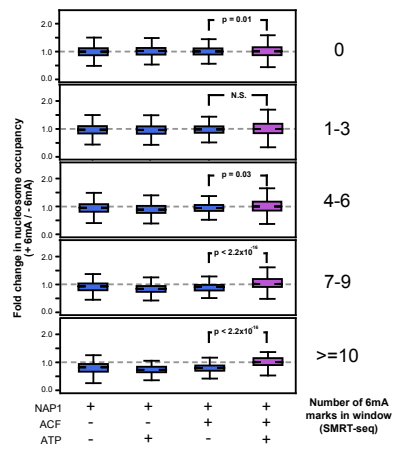

C

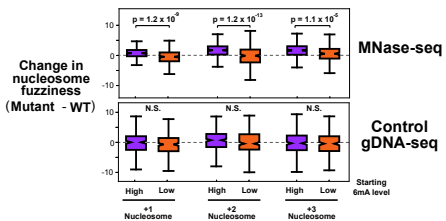

D

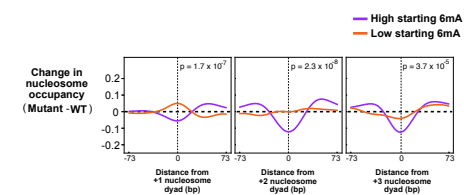

E

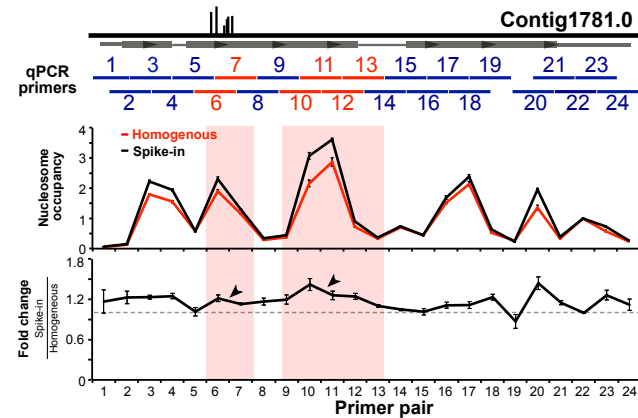

F

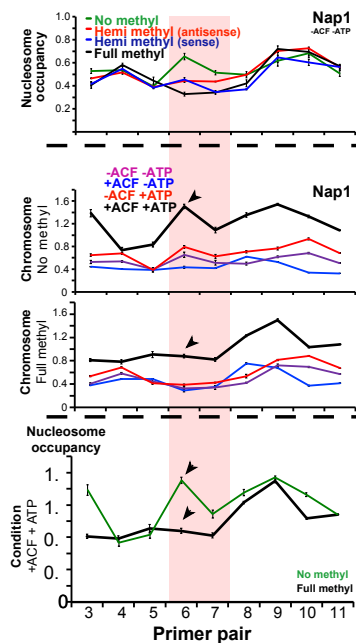

Supplement: NIHMS1527036-supplement-7.pdf [file NIHMS1527036-supplement-7.pdf]
